# Supplementary material for: Alligators employ intermetatarsal reconfiguration to modulate plantigrade ground contact
Source: Oxford University Press journal article supplement (doi:10.1242/jeb.242240), 2021-05-11
Supplement: jeb242240supp.pdf [file jeb242240supp.pdf]

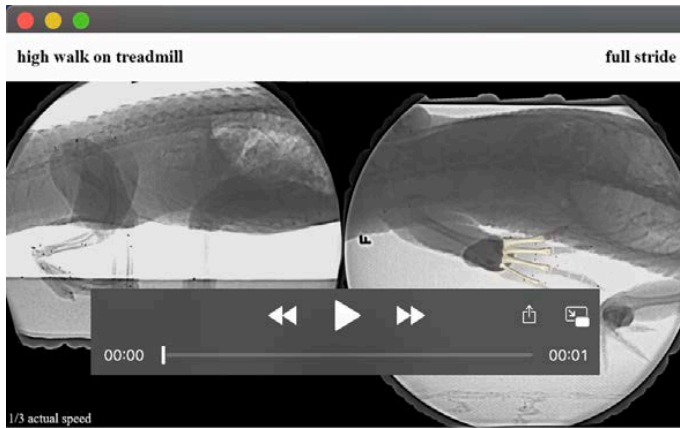

**Movie 1.** High walk on treadmill.

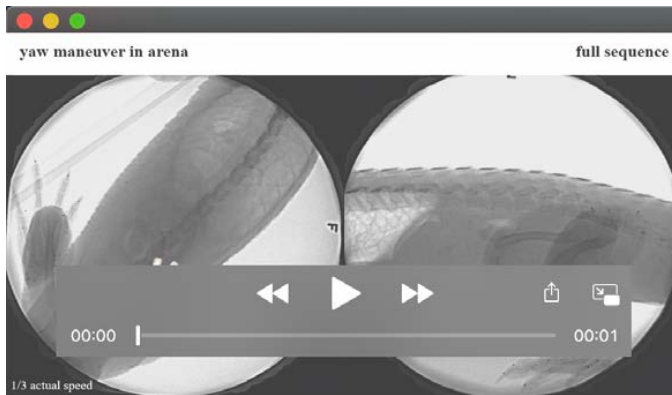

**Movie 2.** Yaw maneuver in arena.

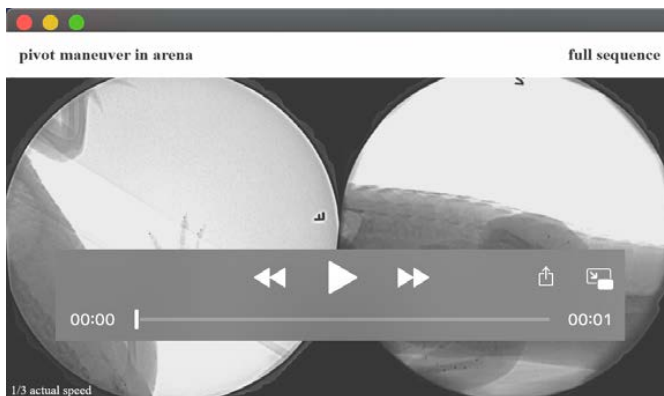

**Movie 3.** Pivot maneuver in arena.
